# Supplementary material for: Origin, Genetic Diversity, and Evolutionary Dynamics of Novel Porcine Circovirus 3
Source: PubMed Central journal article supplement (PMC6145280; doi:10.1002/advs.201800275), 2018-07-04
Supplement: ADVS-5-1800275-s001.pdf [file ADVS-5-1800275-s001.pdf]

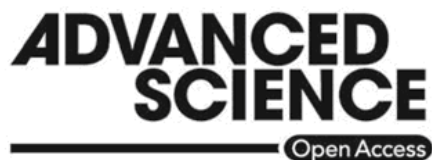

## Supporting Information

for *Adv. Sci.*, DOI: 10.1002/adv.201800275

### Origin, Genetic Diversity, and Evolutionary Dynamics of Novel Porcine Circovirus 3

*Gairu Li, Wanting He, Henan Zhu, Yuhai Bi, Ruyi Wang, Gang Xing, Cheng Zhang, Jiyong Zhou, Kwok-Yung Yuen, George F. Gao, and Shuo Su\**

## **Supporting Information**

### **Origin, Genetic Diversity, and Evolutionary Dynamics of Novel**

#### **Porcine Circovirus 3**

G. Li, W. He, H. Zhu, Y. Bi, R. Wang, G. Xing, C. Zhang, J. Zhou, K.-Y. Yuen, G. F. Gao,  
S. Su\*.

## Supporting figures:

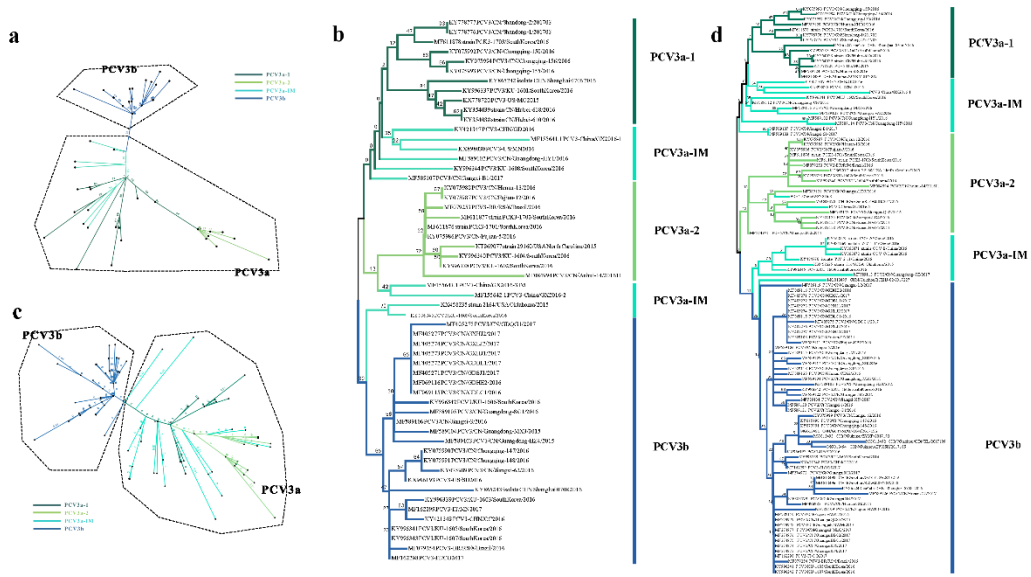

Figure S1: Phylogenetic trees of 56 ORF2 and 109 ORF2 gene of PCV3. a) ML tree of 56 ORF2 complete coding region sequences inferred by RAxML. b) the NJ tree of 56 ORF2 complete coding region, inferred by MEGA 7.0. c) the ML tree of 109 ORF2 complete coding region, inferred by RAxML. d) the NJ tree of 109 ORF2 complete coding region, inferred by MEGA 7.0.

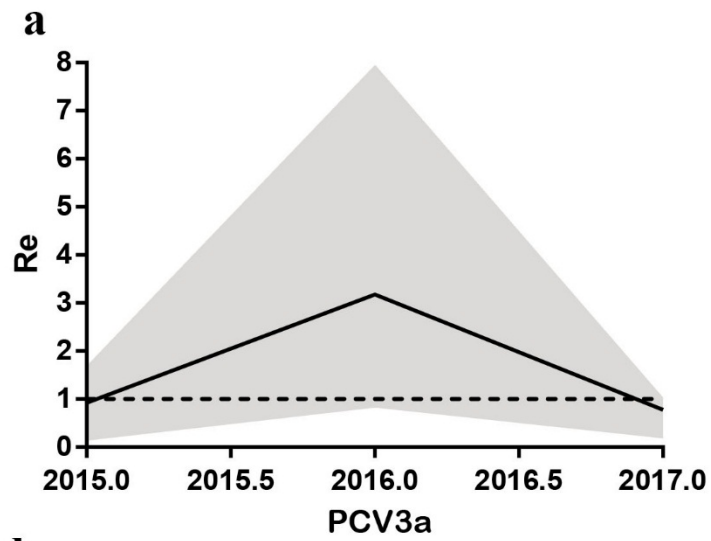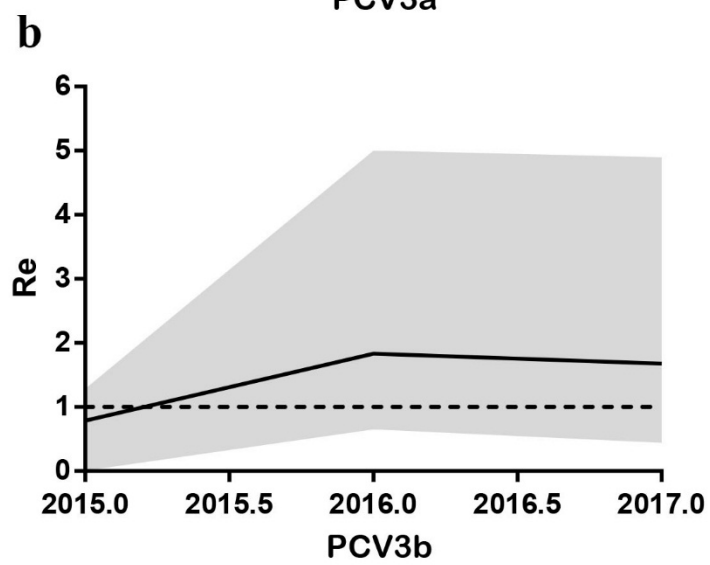

Figure S2: The Re of PCV3 in related sequences collected in 2015, 2016, and 2017. a) PCV3a, b) PCV3b.

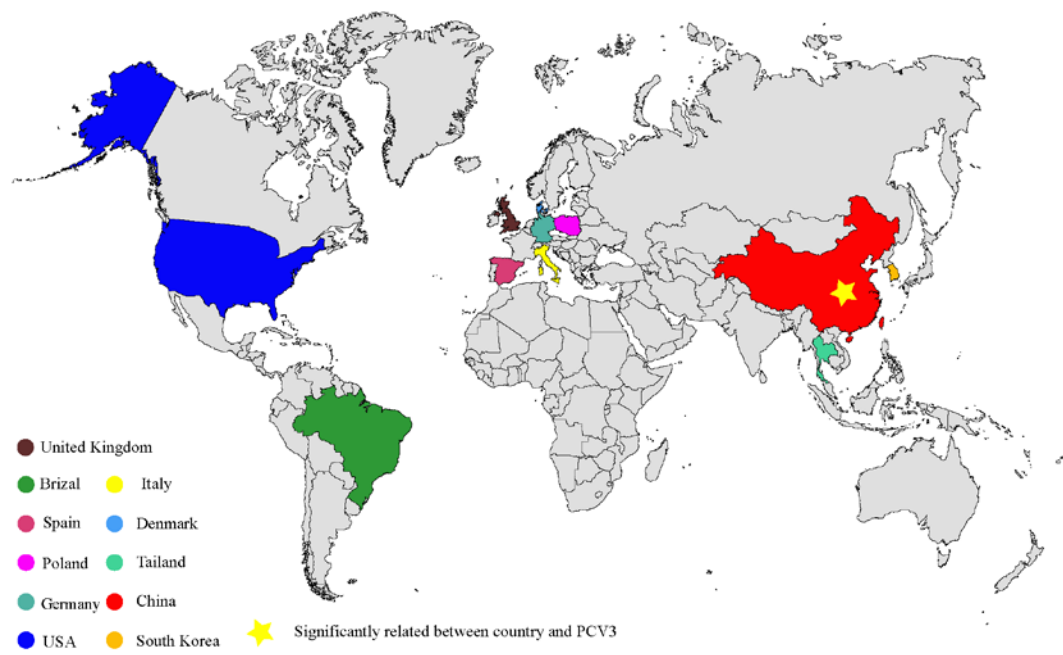

Figure S3: PCV3 distribution countries is marked in different colors and the association of geographical distribution of PCV3 in China is marked with a star.

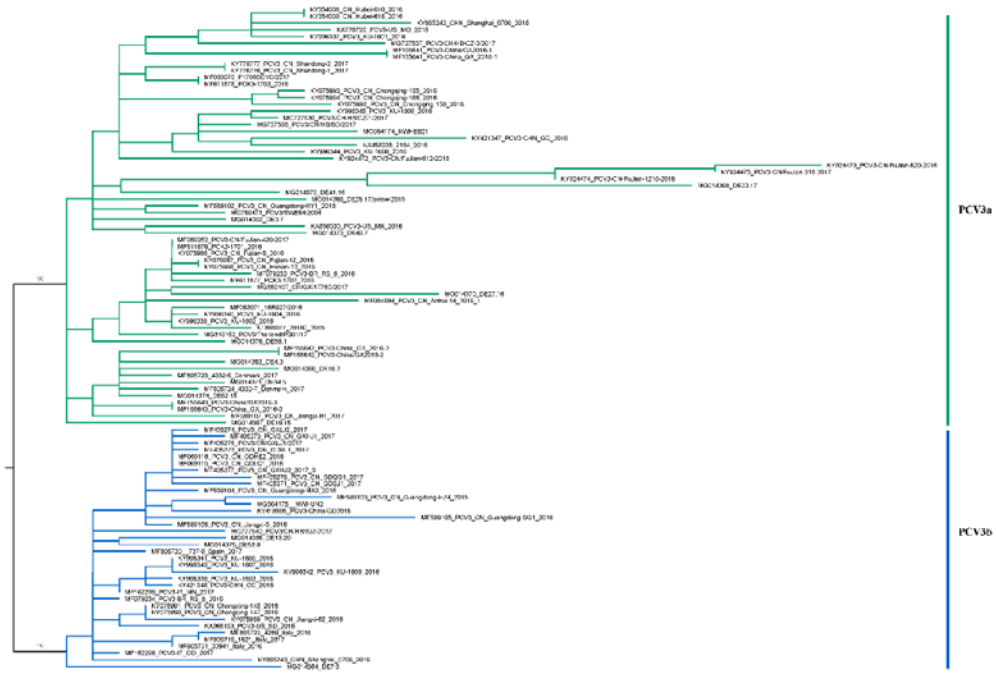

Figure S4: ML tree of 98 PCV3 complete coding sequences collected until May 6<sup>th</sup> 2018 reconstructed using RAxML. We show that if the sequence number increases, the structure of the tree is stable to form PCV3a and PCV3b with a high confidence (bootstrap = 90).

## Supporting tables:

Table S1. Detailed information of the 56 complete coding sequences of PCV3.

| Accession number | Strain name           | Country           | Year |
|------------------|-----------------------|-------------------|------|
| KT869077         | 29160                 | USA               | 2015 |
| KX458235         | 2164                  | USA               | 2015 |
| KX778720         | PCV3-US/MO            | USA               | 2015 |
| KX898030         | PCV3-US/MN            | USA               | 2016 |
| KX966193         | PCV3-US/SD            | USA               | 2016 |
| KY075986         | PCV3/CN/Fujian-5      | China (Fujian)    | 2016 |
| KY075987         | PCV3/CN/Fujian-12     | China (Fujian)    | 2016 |
| KY075988         | PCV3/CN/Henan-13      | China (Henan)     | 2016 |
| KY075989         | PCV3/CN/Jiangxi-62    | China (Jiangxi)   | 2016 |
| KY075990         | PCV3/CN/Chongqing-147 | China (Chongqing) | 2016 |
| KY075991         | PCV3/CN/Chongqing-148 | China (Chongqing) | 2016 |
| KY075992         | PCV3/CN/Chongqing-150 | China (Chongqing) | 2016 |
| KY075993         | PCV3/CN/Chongqing-155 | China (Chongqing) | 2016 |
| KY075994         | PCV3/CN/Chongqing-156 | China (Chongqing) | 2016 |
| KY354038         | CN/Hubei-610          | China (Hubei)     | 2016 |
| KY354039         | CN/Hubei-618          | China (Hubei)     | 2016 |
| KY421347         | PCV3-CHN/GD           | China (Guangdong) | 2016 |
| KY421348         | PCV3-CHN/CC           | China             | 2016 |
| KY778776         | PCV3/CN/Shandong-1    | China (Shandong)  | 2017 |
| KY778777         | PCV3/CN/Shandong-2    | China (Shandong)  | 2017 |
| KY865242         | CHN Shanghai 0706     | China (Shanghai)  | 2016 |
| KY865243         | CHN Shanghai 0708     | China (Shanghai)  | 2016 |
| KY996337         | PCV3/KU-1601          | South Korea       | 2016 |
| KY996339         | PCV3/KU-1603          | South Korea       | 2016 |
| KY996340         | PCV3/KU-1604          | South Korea       | 2016 |
| KY996341         | PCV3/KU-1605          | South Korea       | 2016 |
| KY996342         | PCV3/KU-1606          | South Korea       | 2016 |
| KY996343         | PCV3/KU-1607          | South Korea       | 2016 |
| KY996344         | PCV3/KU-1608          | South Korea       | 2016 |
| KY996345         | PCV3/KU-1609          | South Korea       | 2016 |
| KY996388         | PCV3/KU-1602          | SouthKorea        | 2016 |
| MF069115         | PCV3/CN/GDLC1         | China (Guangdong) | 2016 |
| MF069116         | PCV3/CN/GDHE2         | China (Guangdong) | 2016 |
| MF079253         | PCV3-BR/RS/6          | Brazil            | 2016 |
| MF079254         | PCV3-BR/RS/8          | Brazil            | 2016 |
| MF084994         | PCV3/CN/Anhui-14      | China (Anhui)     | 2016 |
| MF155641         | PCV3-China/GX2016-1   | China (Guangxi)   | 2016 |

|          |                       |                   |      |
|----------|-----------------------|-------------------|------|
| MF155642 | PCV3-China/GX2016-2   | China (Guangxi)   | 2016 |
| MF155643 | PCV3-China/GX2016-3   | China (Guangxi)   | 2016 |
| MF162298 | PCV3-IT/CO/2017       | Italy             | 2017 |
| MF162299 | PCV3-IT/MN            | Italy             | 2017 |
| MF405271 | PCV3/CN/GDSJ1         | China (Guangdong) | 2017 |
| MF405272 | PCV3/CN/GDBL1         | China (Guangdong) | 2017 |
| MF405273 | PCV3/CN/GXHJ1         | China (Guangxi)   | 2017 |
| MF405274 | PCV3/CN/GXLJ2         | China (Guangxi)   | 2017 |
| MF405275 | PCV3/CN/GDQG1         | China (Guangxi)   | 2017 |
| MF405277 | PCV3/CN/GXHJ2         | China (Guangxi)   | 2017 |
| MF589102 | PCV3/CN/Guangdong-HY1 | China (Guangdong) | 2016 |
| MF589103 | PCV3/CN/Guangdong-HZ4 | China (Guangdong) | 2015 |
| MF589104 | PCV3/CN/Guangdong-MX3 | China (Guangdong) | 2015 |
| MF589105 | PCV3/CN/Guangdong-SG1 | China (Guangdong) | 2016 |
| MF589106 | PCV3/CN/Jiangxi-3     | China (Jiangxi)   | 2016 |
| MF589107 | PCV3/CN/Jiangxi-B1    | China (Jiangxi)   | 2017 |
| MF611876 | PCK3-1701             | South Korea       | 2016 |
| MF611877 | PCK3-1702             | South Korea       | 2016 |
| MF611878 | PCK3-1703             | South Korea       | 2016 |

The information of other strains chosen in this study.

| <b>Accession number</b> | <b>Strain name</b>             | <b>Country</b> | <b>Year</b> |
|-------------------------|--------------------------------|----------------|-------------|
| AF055392                | Porcine circovirus Type II     | Canada         | -           |
| AF055394                | Porcine circovirus Type II     | France         | -           |
| AF071878                | Beak and feather disease virus | -              | -           |
| AF080560                | Beak and feather disease virus | -              | -           |
| AF252610                | Columbid circovirus            | -              | -           |
| AJ301633                | Canary circovirus              | -              | -           |
| AJ304456                | Goose circovirus               | Germany        | -           |
| AY228555                | DuCV                           | Brandenburg    | 2002        |
| DQ100076                | 33753-52                       | USA            | -           |
| DQ146997                | 4-1131                         | Australia      | -           |
| DQ172906                | Starling circovirus            | Spain          | 2005        |
| DQ845075                | Finch circovirus               | -              | -           |
| EU056309                | H51                            | Germany        | 2006        |
| EU056310                | Sw4                            | Germany        | 2006        |
| EU148503                | DK1980PMWSfree                 | Denmark        | -           |
| EU148504                | DK1987PMWSfree                 | Denmark        | -           |
| FJ667585                | PCV2-RP3                       | China          | 2007        |
| GQ404851                | Chimp17                        | Rwanda         | 2002        |
| GU247991                | FJGT0602                       | China          | 2006        |
| GU799606                | Barbel circovirus              | Hungary        | 2008        |



|          |                                           |                   |      |
|----------|-------------------------------------------|-------------------|------|
| HQ831539 | PT-20683-09                               | Portugal: Montijo | 2009 |
| JQ814849 | Rhinolophus ferrumequinum<br>circovirus 1 | China             | 2011 |
| JQ821392 | 214                                       | USA               | 2011 |
| JX512854 | S00-1966/4-3                              | Switzerland       | 2000 |
| JX512855 | S98-305/2                                 | Switzerland       | 1998 |
| JX534236 | HALY12                                    | China             | 2012 |
| JX982219 | KSRY1103                                  | China: Kunshan    | 2011 |
| KC241982 | UCD1-1698                                 | USA               | 2011 |
| KC241983 | UCD3-478                                  | USA               | 2011 |
| KC339249 | XOR7                                      | Myanmar           | 2008 |
| KC990120 | 90507                                     | China             | 2009 |
| KJ408798 | PCV1-Eng-1970                             | United Kingdom    | 1990 |
| KJ641711 | BtMr-CV/GD2012                            | China             | 2012 |
| KJ641716 | BtPsp.-CV/GD2012                          | China             | 2012 |
| KJ641723 | BtRs-CV/HuB2013                           | China             | 2013 |
| KJ641724 | BtRa-CV/JS2013                            | China             | 2013 |
| KJ641727 | BtPa-CV-1/NX2013                          | China             | 2013 |
| KJ641741 | BtRf-CV-61/YN2010                         | China             | 2010 |
| KJ641742 | BtRf-CV-62/YN2010                         | China             | 2010 |
| KP229370 | CD13088                                   | Taiwan: Chiayi    | 2013 |
| KP793918 | 8454V25-1                                 | Germany           | 2010 |
| KT795287 | MEX/41238/2014                            | Mexico: Veracruz  | 2014 |
| KT795290 | USA/45358/2015                            | USA               | 2015 |
| KY363870 | CCV-A                                     | China             | 2016 |
| KY363871 | CCV-B                                     | China             | 2016 |
| KY363872 | CCV-C                                     | China             | 2016 |
| KY484769 | YiY-1-11                                  | China             | 2016 |
| KY484770 | YiY-2-11                                  | China             | 2016 |
| MF374971 | PCV3/CN/Guangxi002/2017                   | China             | 2017 |
| MF374972 | PCV3/CN/Guangxi003/2017                   | China             | 2017 |
| MF374973 | PCV3/CN/Guangxi004/2017                   | China             | 2017 |
| MF374974 | PCV3/CN/Guangxi005/2017                   | China             | 2017 |
| MF374975 | PCV3/CN/GuangxiBB01/2017                  | China             | 2017 |
| MF374976 | PCV3/CN/GuangxiBB02/2017                  | China             | 2017 |
| MF374977 | PCV3/CN/GuangxiNNLQ/2017                  | China             | 2017 |
| MF374978 | PCV3/CN/GuangxiNNWM/2017                  | China             | 2017 |
| MF374979 | PCV3/CN/GuangxiQZSS/2017                  | China             | 2017 |
| MF383379 | PCV3/CN/Guangxi001/2017                   | China             | 2017 |
| MF496982 | PCV3/CN/Hainan001/2017                    | China             | 2017 |
| MF589102 | PCV3/CN/Guangdong-<br>HY1/2016            | China             | 2016 |
| MF589108 | PCV3/CN/Fujian-FZ/2015                    | China             | 2015 |
| MF589109 | PCV3/CN/Fujian-HWK1/2016                  | China             | 2016 |

|          |                                  |       |      |
|----------|----------------------------------|-------|------|
| MF589110 | PCV3/CN/Fujian-HWK2/2016         | China | 2016 |
| MF589111 | PCV3/CN/Fujian-KP1/2016          | China | 2016 |
| MF589112 | PCV3/CN/Guangdong-CH/2016        | China | 2016 |
| MF589113 | PCV3/CN/Guangdong-GZ/2017        | China | 2017 |
| MF589114 | PCV3/CN/Guangdong-HY/2016        | China | 2016 |
| MF589115 | PCV3/CN/Guangdong-<br>JM1/2016   | China | 2016 |
| MF589116 | PCV3/CN/Guangdong-<br>MX1/2016   | China | 2016 |
| MF589117 | PCV3/CN/Guangdong-SG/2016        | China | 2016 |
| MF589118 | PCV3/CN/Guangdong-X1/2016        | China | 2016 |
| MF589119 | PCV3/CN/Guangxi-L2/2017          | China | 2017 |
| MF589120 | PCV3/CN/Guangxi-LD4/2016         | China | 2016 |
| MF589121 | PCV3/CN/Guangxi-LD5/2016         | China | 2016 |
| MF589122 | PCV3/CN/Guangxi-NK/2015          | China | 2015 |
| MF589123 | PCV3/CN/Guangxi-WZ/2016          | China | 2016 |
| MF589124 | PCV3/CN/Hunan-B8/2016            | China | 2016 |
| MF589125 | PCV3/CN/Hunan-CD33/2016          | China | 2016 |
| MF589126 | PCV3/CN/Hunan-CZ/2017            | China | 2017 |
| MF589127 | PCV3/CN/Hunan-HWF2/2017          | China | 2017 |
| MF589128 | PCV3/CN/Hunan-HWF3/2017          | China | 2017 |
| MF589129 | PCV3/CN/Hunan-XHD2/2016          | China | 2016 |
| MF589130 | PCV3/CN/Jiangxi-1/2016           | China | 2016 |
| MF589131 | PCV3/CN/Jiangxi-G1/2016          | China | 2016 |
| MF589132 | PCV3/CN/Jiangxi-QN3/2016         | China | 2016 |
| MF589133 | PCV3/CN/Jiangxi-S1/2017          | China | 2017 |
| MF589134 | PCV3/CN/Jiangxi-XY/2017          | China | 2017 |
| MG008470 | CHN/Guizhou/BJZHJ-<br>01/2017225 | China | 2017 |
| MG013489 | CHN/Guizhou/GYKY-<br>01/2017215  | China | 2017 |
| MG013490 | CHN/Guizhou/GYKY-<br>02/2017219  | China | 2017 |
| MG013491 | CHN/Guizhou/QNDSH/2017156        | China | 2016 |
| MG013492 | CHN/Guizhou/QDNKL/2017199        | China | 2017 |
| MG013493 | CHN/Guizhou/ZYXP/2017193         | China | 2016 |
| MG013494 | CHN/Guizhou/ZYXSH/2017185        | China | 2016 |
| MG013495 | CHN/Guizhou/BJZHJ-<br>02/2017227 | China | 2017 |
| MG013496 | CHN/Guizhou/BJZHJ-<br>03/2017250 | China | 2017 |

Note: “-” means that this information was not available on NCBI.

Table S2. The mean and 95% HPD nucleotide substitution rate and tMRCA of PCV1, PCV2, PCV3, ORF1 and ORF2 of PCV3 each clade.

| Name                | Substitution rate       |                                                  | tMRCA   |                 |
|---------------------|-------------------------|--------------------------------------------------|---------|-----------------|
|                     | mean                    | 95%HPD                                           | mean    | 95%HPD          |
| <b>PCV1</b>         | 1.15 x 10 <sup>-5</sup> |                                                  | -       | -               |
| <b>PCV2</b>         | 1.2 x 10 <sup>-3</sup>  | 8.23 x 10 <sup>-4</sup> -1.61 x 10 <sup>-3</sup> | -       | -               |
| <b>PCV3</b>         | 1.69 x 10 <sup>-3</sup> | 9.99 x 10 <sup>-4</sup> -2.45 x 10 <sup>-3</sup> |         |                 |
| <b>PCV3a-1 ORF1</b> | 1.1 x 10 <sup>-3</sup>  | 1.0 x 10 <sup>-4</sup> -2.5 x 10 <sup>-3</sup>   | 2013.61 | 2012.09-2014.77 |
| <b>PCV3a-2 ORF1</b> | 1.1 x 10 <sup>-3</sup>  | 1.0 x 10 <sup>-4</sup> -2.5 x 10 <sup>-3</sup>   | 2013.48 | 2011.97-2014.63 |
| <b>PCV3b ORF1</b>   | 1.4 x 10 <sup>-3</sup>  | 1.0 x 10 <sup>-4</sup> -3.5 x 10 <sup>-3</sup>   | 2013.25 | 2011.51-2014.52 |
| <b>PCV3a-1 ORF2</b> | 3.3 x 10 <sup>-3</sup>  | 5.0 x 10 <sup>-4</sup> -4.6 x 10 <sup>-3</sup>   | 2014.00 | 2013.19-2014.72 |
| <b>PCV3a-2 ORF2</b> | 2.5 x 10 <sup>-3</sup>  | 4.0 x 10 <sup>-4</sup> -4.8 x 10 <sup>-3</sup>   | 2013.91 | 2013.05-2014.64 |
| <b>PCV3b ORF2</b>   | 3.2 x 10 <sup>-3</sup>  | 6.0 x 10 <sup>-4</sup> -7.2 x 10 <sup>-3</sup>   | 2013.79 | 2012.85-2014.55 |

Table S3. Amino acid analysis for PCV3 complete coding sequences.

| <b>Genotype/<br/>Position</b> | <b>PCV3a-1<br/>(11)</b> | <b>PCV3a-2<br/>(10)</b> | <b>PCV3b<br/>(25)</b> | <b>PCV3a-<br/>IM<br/>(10)</b> |
|-------------------------------|-------------------------|-------------------------|-----------------------|-------------------------------|
| 122                           | S(4)                    | S(0)                    | <b>A(0)</b>           | S(1)                          |
| 320                           | A(1)                    | A(0)                    | <b>V(0)</b>           | A(2)                          |
| 323                           | R(0)                    | R(0)                    | <b>K(0)</b>           | K(5)                          |
| 373                           | S(2)                    | <b>T(0)</b>             | S(1)                  | S(0)                          |
| 446                           | I(2)                    | <b>L(0)</b>             | I(0)                  | I(0)                          |

Note: from amino site 297 is the cap coding region.

Table S4. Predicted epitopes of PCV3a and PCV3b.

| Cap protein  | Epitope  | Residue(aa) | Epitope sequence                                    |
|--------------|----------|-------------|-----------------------------------------------------|
| <b>PCV3a</b> | <b>A</b> | 5~25        | AIFRRRPRPRRRRRHRRRYAR                               |
|              | <b>B</b> | 42~61       | KYSTMNVISVGTPQNNKPWH                                |
|              | <b>C</b> | 71~81       | EWETAISFEYY                                         |
|              | <b>D</b> | 95~105      | SPAQQTKTMTFG                                        |
|              | <b>E</b> | 114-159     | AWTTNTWLQDDPYAESSTRKVMTSKKK<br>HSRYFTP KPILAGTTSAHP |
|              | <b>F</b> | 169-175     | PTPWLNT                                             |
|              | <b>G</b> | 191-204     | VPEKTGMTDFYGTK                                      |
| <b>PCV3b</b> | <b>A</b> | 5~26        | AIFRRRPRPRRRRRHRRRYVRR                              |
|              | <b>B</b> | 42~60       | KYSTMNVISVGTPQNNKPW                                 |
|              | <b>C</b> | 71~81       | EWETAISFEYY                                         |
|              | <b>D</b> | 95~105      | SPAQQTKTMTFG                                        |
|              | <b>E</b> | 114-159     | AWTTNTWLQDDPYAESSTRKVMTSKKK<br>HSRYFTP KPILAGTT     |
|              | <b>F</b> | 169-174     | PTPWLN                                              |
|              | <b>G</b> | 191-204     | VPEKTGMTDFYGTK                                      |
